# Supplementary material
Source: Research Square preprint supplement (doi:10.21203/rs.3.rs-9441012/v1)

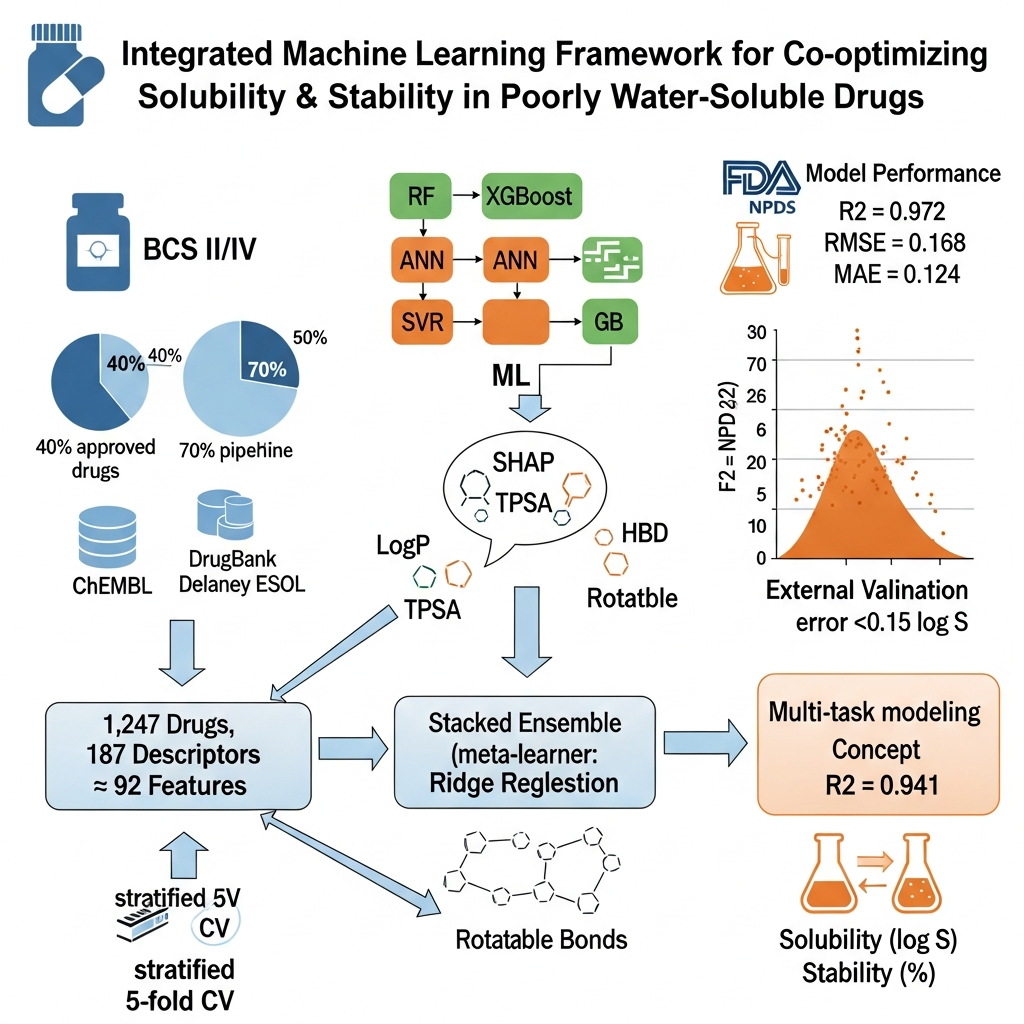

Supplement: Supplementary file 1 [file 633ea2eb55f74fe56cc1d582.docx]
